# Supplementary material for: DC-SIGN binding to mannosylated B-cell receptors in follicular lymphoma down-modulates receptor signaling capacity
Source: PubMed Central journal article supplement (PMC8175722; doi:10.1038/s41598-021-91112-7), 2021-06-03
Supplement: 41598_2021_91112_MOESM1_ESM.pdf [file 41598_2021_91112_MOESM1_ESM.pdf]

## **SUPPLEMENTARY INFORMATION**

### **DC-SIGN binding to mannosylated B-cell receptors in follicular lymphoma down-modulates receptor signalling capacity**

Beatriz Valle-Argos<sup>1</sup>, Giorgia Chiodin<sup>1</sup>, Dean J Bryant<sup>1</sup>, Joe Taylor<sup>1</sup>, Elizabeth Lemm<sup>1</sup>, Patrick J Duriez<sup>1</sup>, Philip J Rock<sup>2</sup>, Jonathan C Strefford<sup>1</sup>, Francesco Forconi<sup>1</sup>, Richard W Burack<sup>2</sup>, Graham Packham<sup>1\*</sup> and Freda K Stevenson<sup>1\*</sup>

<sup>1</sup>Cancer Research UK Centre, Cancer Sciences Unit, University of Southampton, Faculty of Medicine, Southampton General Hospital, Southampton, United Kingdom

<sup>2</sup>Pathology Department, University of Rochester Medical Center, USA

\* GP and FKS contributed equally to this work.

Correspondence:

Freda K Stevenson Phone: +44 (0)23 8120 5161, Fax: +44 (0)238120 5152, e-mail: [fs@soton.ac.uk](mailto:fs@soton.ac.uk)

Graham Packham Phone: +44 (0)23 8120 5170, Fax: +44 (0)238120 5152, [gpackham@soton.ac.uk](mailto:gpackham@soton.ac.uk)

## Methods

### *Phenotyping of FL samples*

For detection of CD10, CD20 and sIgM, FL samples were incubated with FITC- or APC-conjugated anti-human CD10 (BioLegend), PerCP/Cy5.5-conjugated anti-human CD20 (BioLegend), PE-conjugated anti-human IgM (DAKO) or appropriate isotype control antibodies. sIgM expression was analyzed in the CD10<sup>+</sup>/CD20<sup>+</sup> population and GeoMFI calculated by subtracting the control antibody signal.

For analysis of BCL2 expression, FL samples were fixed in 1.6% (w/v) paraformaldehyde (VWR) for 5 minutes at room temperature and then re-suspended in ice-cold 90% (v/v) methanol and incubated on ice for 10 minutes. Cells were then washed and re-suspended in 1% (w/v) bovine serum albumin (BSA) in phosphate-buffered saline (PBS). Cells were incubated with PerCP-Cy5.5-conjugated anti-CD20 (clone H1/FB1) and PE-conjugated anti-BCL2 (BD Biosciences), or controls.

To detect binding of DC-SIGN-HA, FL samples were stained with AF488-conjugated anti-HA tag (Biolegend), APC-conjugated anti-human CD10 (Biolegend) and PerCP/Cy5.5-conjugated anti-human CD20 (Biolegend) and DC-SIGN binding was quantified within the CD10<sup>+</sup>/CD20<sup>+</sup> population. MFIs were calculated by subtracting the signal of untreated cells.

### *Gene set enrichment analysis (GSEA)*

GSEA was performed using the Broad Institute browser (<http://www.broadinstitute.org/>) and the MsigDB C2 dataset (<https://www.gsea-msigdb.org/gsea/msigdb/genesets.jsp?collection=C2>) according to the pre-ranked protocol using 1000 permutations, weighted enrichment, and meandiv normalization parametrizations to calculate normalized enrichment scores (NES) and FDR q-values.<sup>1,2</sup> Results for all gene sets are provided in Supplementary file 2 and a comparison of NES values

for anti-IgM or DC-SIGN-Fc-treated cells is shown in Fig. 1d (with selected gene sets indicated).

## REFERENCES

- 1 Subramanian, A. *et al.* Gene set enrichment analysis: a knowledge-based approach for interpreting genome-wide expression profiles. *Proc Natl Acad Sci U S A* **102**, 15545-15550, doi:10.1073/pnas.0506580102 (2005).
- 2 Liberzon, A. *et al.* Molecular signatures database (MSigDB) 3.0. *Bioinformatics* **27**, 1739-1740, doi:10.1093/bioinformatics/btr260 (2011).
- 3 Swerdlow SH, C. E., Harris NL, Jaffe ES, Pileri SA, Stein H, Thiele J. Vol. Revised 4th Edition, Volume 2 (IARC publication).

| Sample   | Grade | Source     | N-GLY sites in Vh     | IgM (MFI) | Isotype | % CD20+ cells | % BCL2+ cells within CD20+ gate | DC-SIGN-Fc binding (MFI) | DC-SIGN-HA binding (MFI) |
|----------|-------|------------|-----------------------|-----------|---------|---------------|---------------------------------|--------------------------|--------------------------|
| FL-B034  | 2     | Lymph node | FR3, CDR3             | 6665      | Lambda  | 73            | 96                              | 2470                     | 2092                     |
| FL-B054  | 1-2   | Spleen     | CDR1, CDR1-FR2, CDR3  | 4716      | Kappa   | 91            | 99                              | 7060                     | 8613                     |
| FL-B536  | 1     | Lymph node | DCR1, FR2-CDR2        | 3105      | Kappa   | 89            | 95                              | 1501                     | 1040                     |
| FL-LY86  | 1     | Lymph node | FR1, CDR1, CDR2, CDR3 | --        | Kappa   | 70            | 87                              | 6907                     | 5526                     |
| FL-LY221 | 1     | Lymph node | CDR2x2, CDR3          | 6074      | Kappa   | 83            | 81                              | 2475                     | 2007                     |

**Supplementary table S1. Primary FL samples.**

Details of FL primary samples. All samples were sIgM<sup>+</sup>, carried introduced N-glycosylation sites and FL cells (ie, CD10<sup>+</sup>CD20<sup>+</sup> cells) bound DC-SIGN-Fc and DC-SIGN-HA. Grade <sup>3</sup>. N-glycosylation motifs in IGHV.

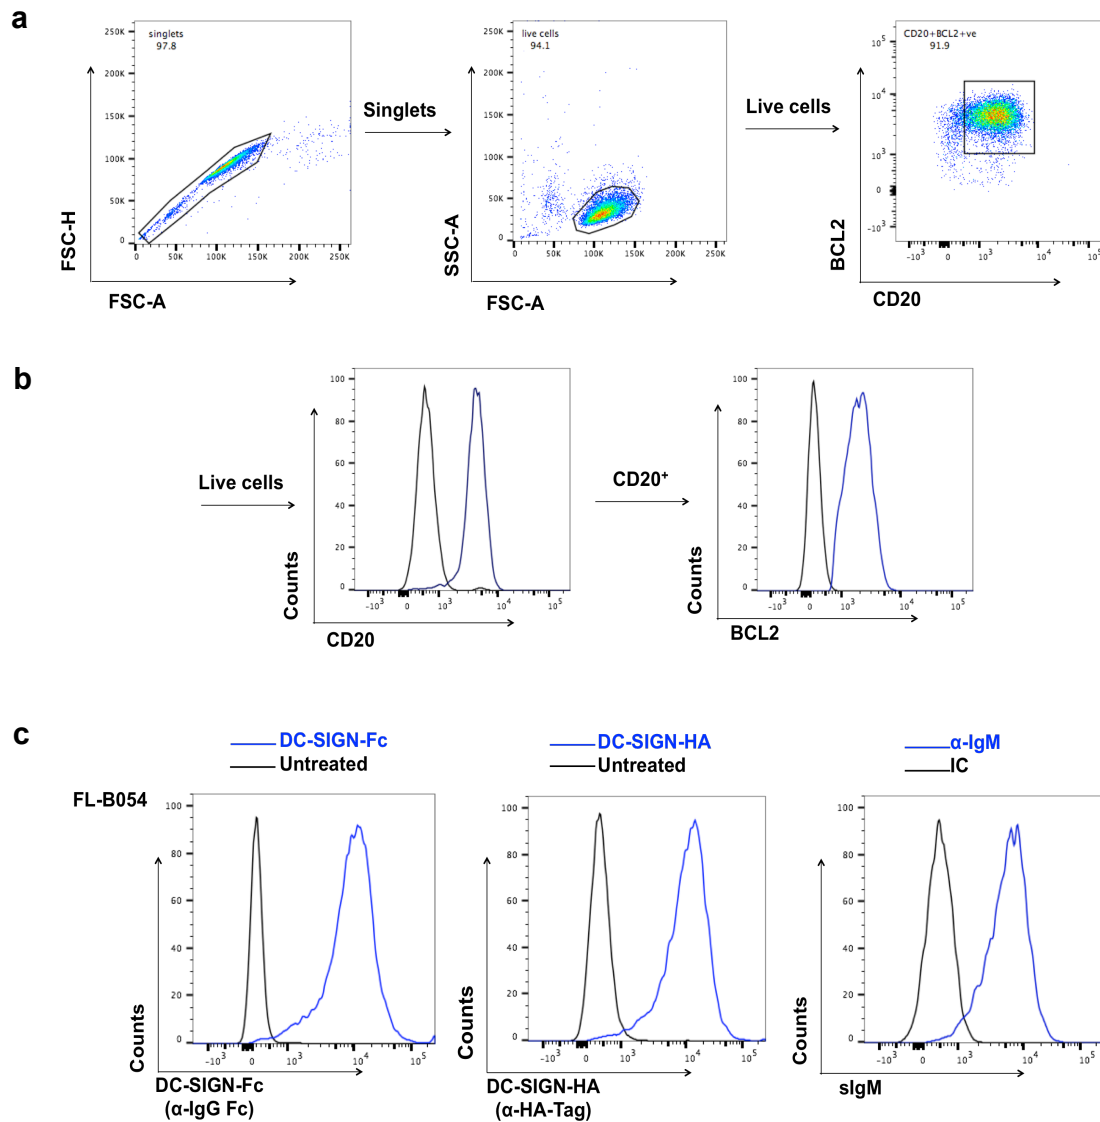

**Supplementary figure 1. Characterization of primary FL samples.**

**(a, b)** Flow cytometry plots detailing the gating strategy for analysis of FL samples showing representative results using sample FL-B054. **(a)** Gating of single, viable and CD20<sup>+</sup>/BCL2<sup>+</sup> cells. **(b)** Representative staining for CD20, and BCL2 within the CD20<sup>+</sup> population (blue) versus control antibody (black). **(c)** Analysis of DC-SIGN binding gated on CD10<sup>+</sup>/CD20<sup>+</sup> and sIgM expression in one representative FL case (FL-B054).

a

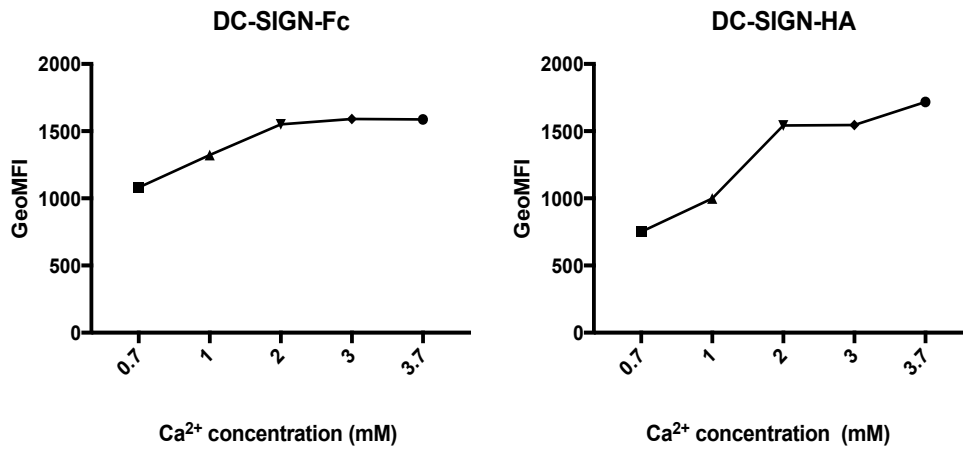

b

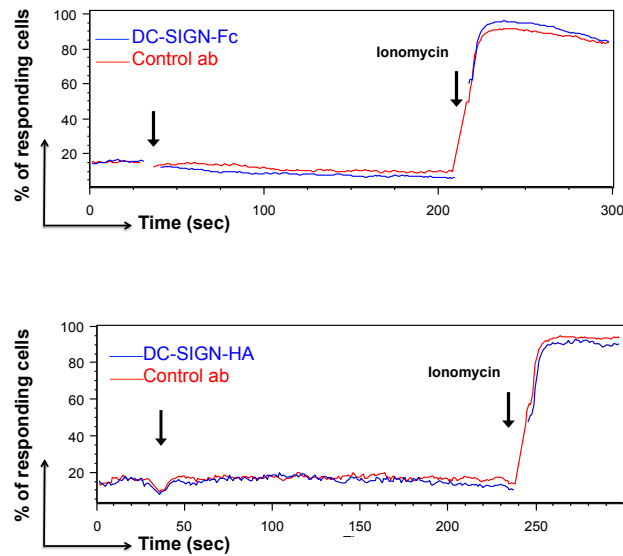

**Supplementary Figure 2. Effect of Ca<sup>2+</sup> concentration on DC-SIGN-Fc/HA binding and iCa<sup>2+</sup> fluxes with DC-SIGN in WSU-FSCCL.**

**(a)** Effect of Ca<sup>2+</sup> concentration on DC-SIGN-Fc/HA binding. WSU-FSCCL cells were incubated with DC-SIGN-Fc (20 µg/ml) or DC-SIGN-HA (20 µg/ml) in media with the indicated concentrations of Ca<sup>2+</sup> for 30 min on ice. Cells were stained with APC Cy-7 F(ab')<sub>2</sub> anti-hIgG Fc to detect DC-SIGN-Fc binding or AF488 anti-HA tag to detect DC-SIGN-HA. **(b)** Calcium flux analysis with DC-SIGN in WSU-FSCCL. Graphs show the percentage of responding cells before and after addition (indicated by the first arrow) of DC-SIGN-Fc or DC-SIGN-HA or control antibody (control ab). The Ca<sup>2+</sup> ionophore ionomycin (1 µM; Sigma) was then added as a positive control (second arrow).

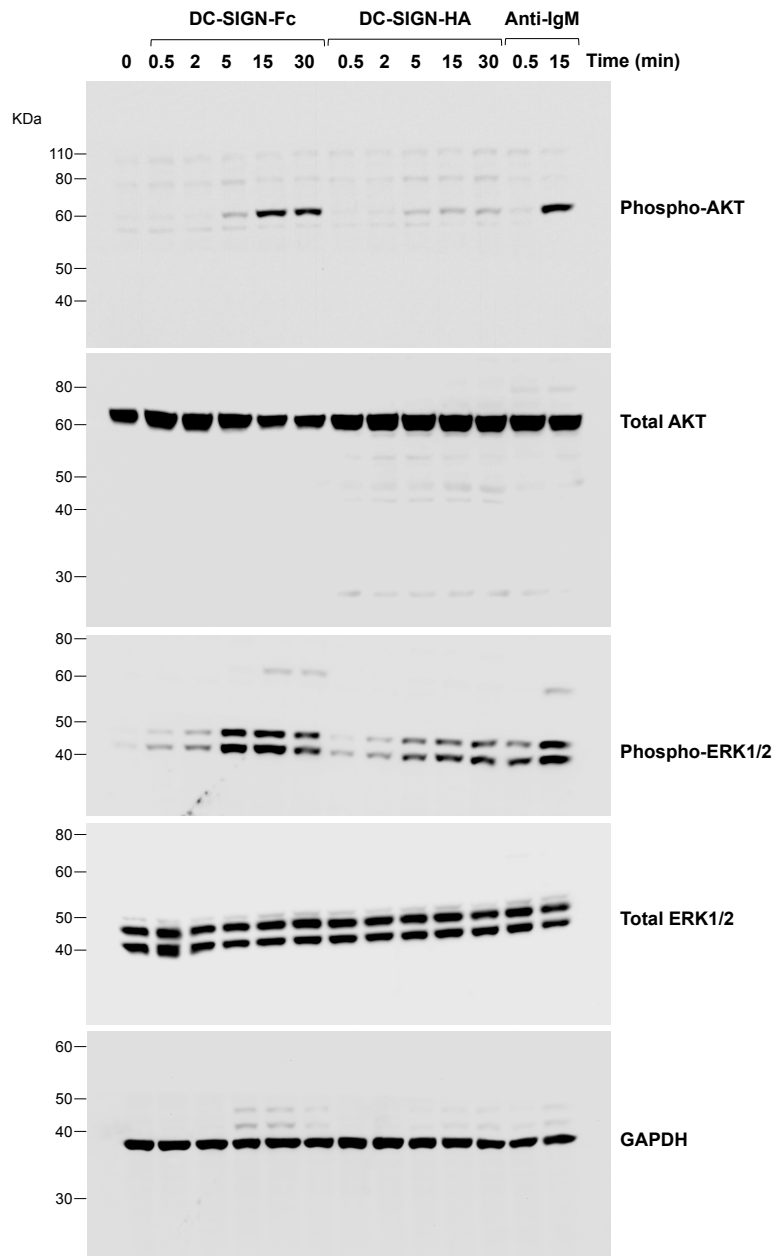

**Supplementary Figure 3: DC-SIGN signaling in WSU-FSCCL cells.**

Full length images of blots shown in Figure 3 of the main manuscript. Molecular weight markers shown (KDa).

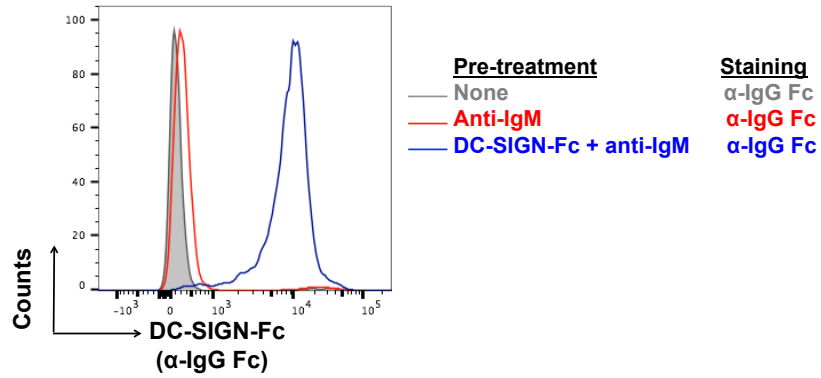

**Supplementary Figure 4: DC-SIGN-Fc binding to WSU-FSCCL cells in the presence of anti-IgM.**

**(a)** WSU-FSCCL cells from the endocytosis experiment (Fig. 5) were stained with APC Cy-7 F(ab')<sub>2</sub> anti-hIgG Fc ( $\alpha$ -IgG Fc) to detect DC-SIGN-Fc binding by FACS. No addition is shown in grey, cells stimulated with anti-IgM (AF488 conjugated) for 30 min at 4°C is shown in red and cells pre-exposed to DC-SIGN-Fc and then stimulated with anti-IgM (AF488 conjugated) for 30 min at 4°C is shown in blue.



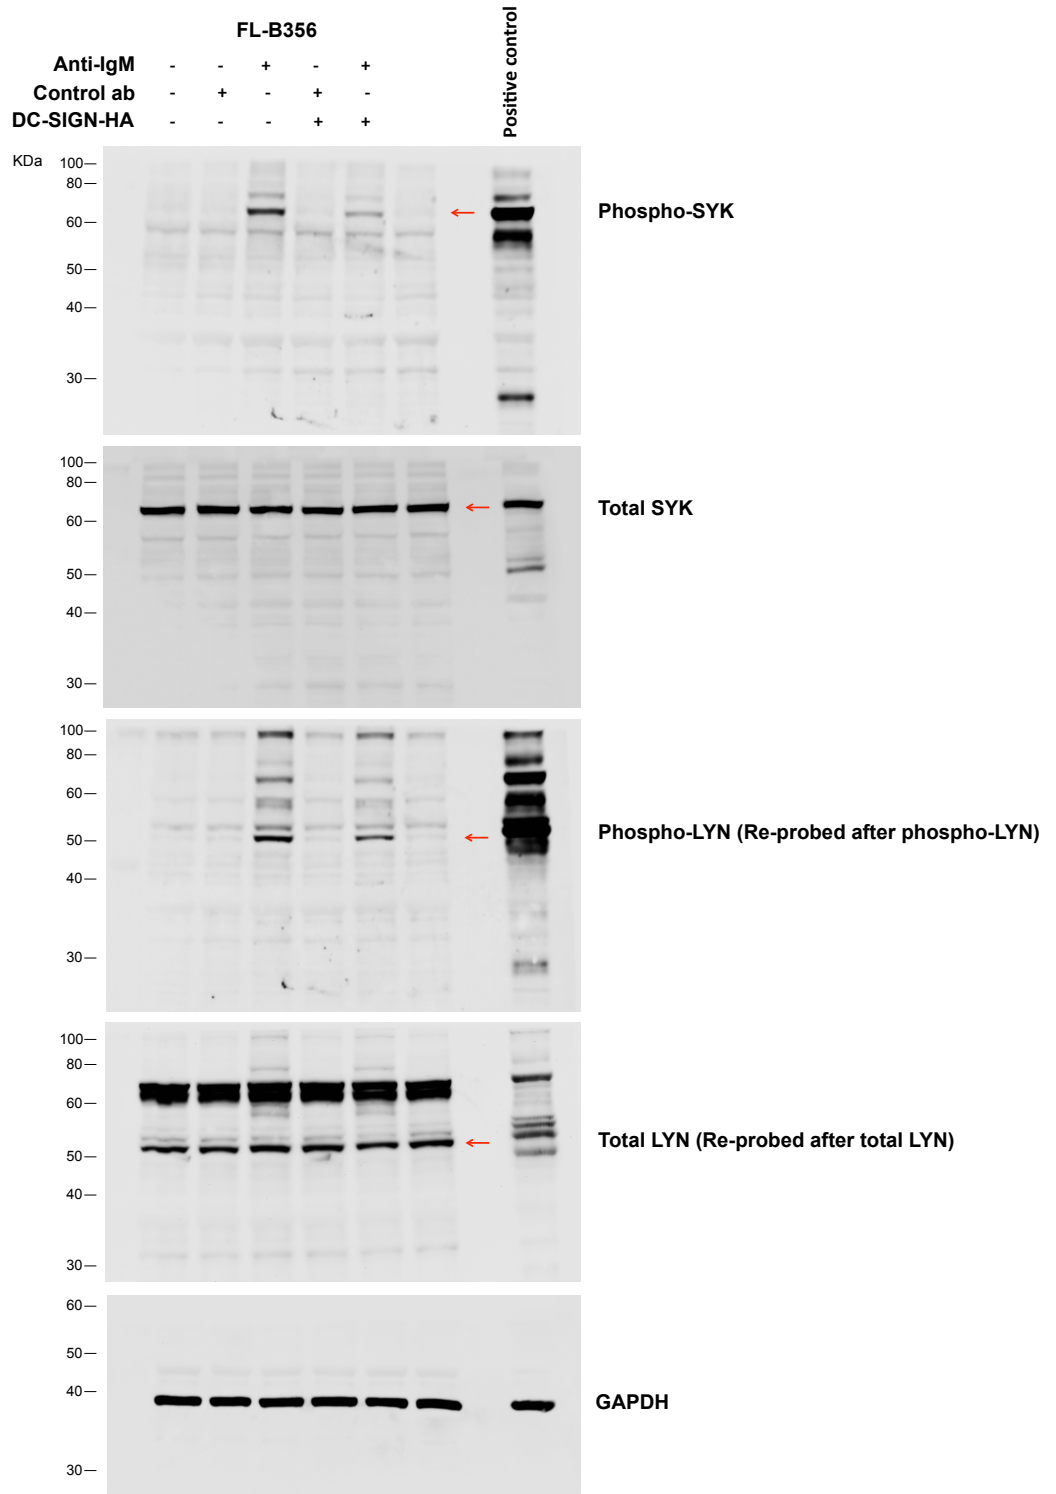

**Supplementary Figure 5: Effect of DC-SIGN on anti-IgM signaling in primary FL samples.**

Full length images of blots shown in Figure 6 of the main manuscript. Positive control is OCI-Ly7 cells treated with anti-IgM for 30 seconds. The gels were run under the same experimental conditions. Because of limited material availability expression of total and phospho-LYN was detected by re-probing after analysis of total and phospho-SYK, respectively. Relevant bands are indicated by arrows and molecular weight markers are shown (kDa).
